# Supplementary material for: Transcriptome analysis reveals rapid defence responses in wheat induced by phytotoxic aphid Schizaphis graminum feeding
Source: PubMed Central journal article supplement (PMC7199342; doi:10.1186/s12864-020-6743-5), 2020-05-04
Supplement: 12864_2020_6743_MOESM4_ESM.pdf [file 12864_2020_6743_MOESM4_ESM.pdf]

Sg\_2h vs Control

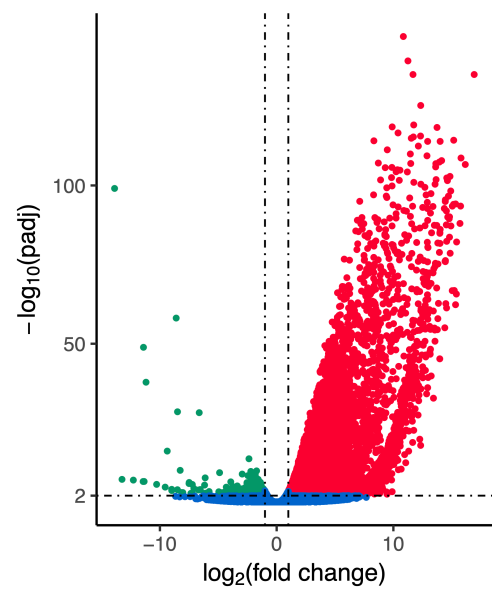

Differential Expressed Genes ( 9761 )

- up regulated: 9105
- down regulated: 656

Sg\_6h vs Control

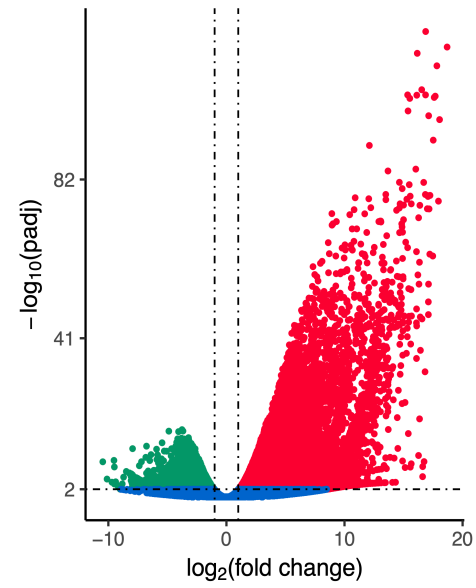

Differential Expressed Genes ( 22183 )

- up regulated: 13935
- down regulated: 8248

Sg\_12h vs Control

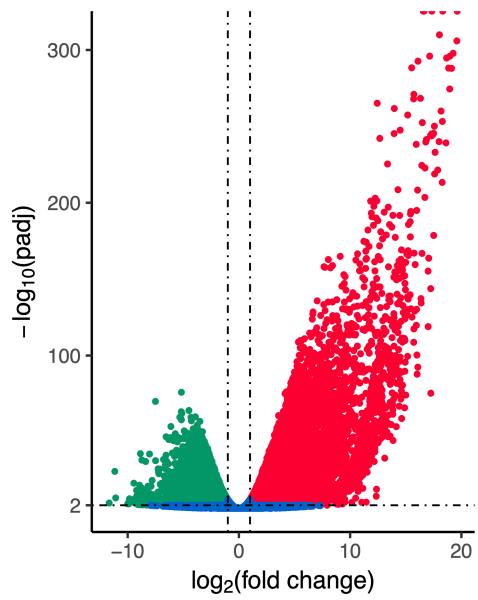

Differential Expressed Genes ( 29875 )

- up regulated: 16214
- down regulated: 13661

Sg\_24h vs Control

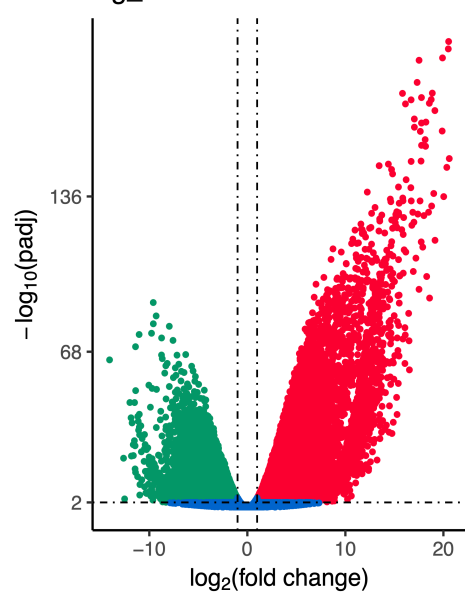

Differential Expressed Genes ( 32741 )

- up regulated: 17771
- down regulated: 14970

Sg\_48h vs Control

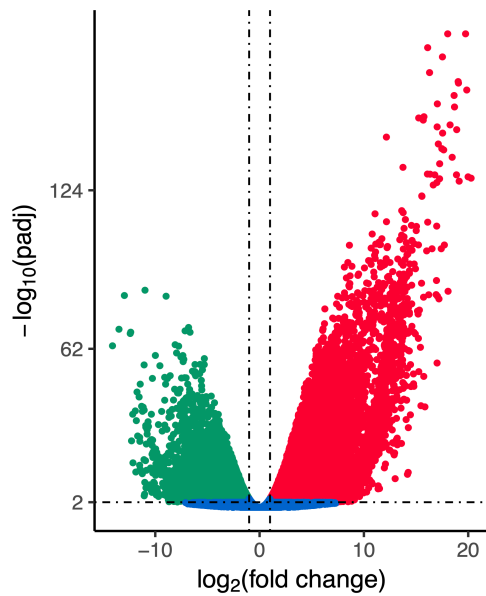

Differential Expressed Genes ( 30729 )

- up regulated: 17523
- down regulated: 13206
