# Supplementary material for: Transcriptome analysis reveals rapid defence responses in wheat induced by phytotoxic aphid Schizaphis graminum feeding
Source: PubMed Central journal article supplement (PMC7199342; doi:10.1186/s12864-020-6743-5), 2020-05-04

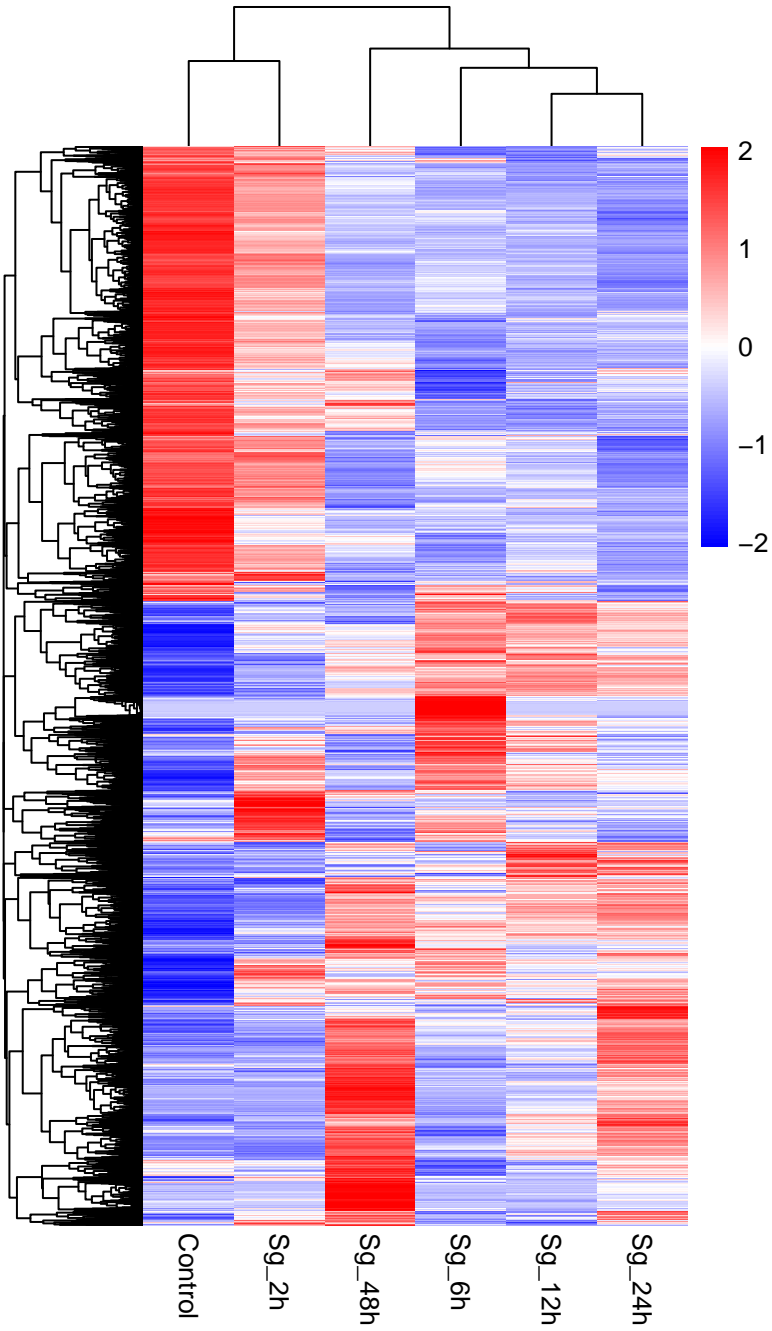

Supplement: 12864_2020_6743_MOESM5_ESM.pdf [file 12864_2020_6743_MOESM5_ESM.pdf]
